# Supplementary material for: Mutual relationships between structural and functional changes in a PsbM-deletion mutant of photosystem II
Source: Royal Society of Chemistry journal article supplement (doi:10.1039/c6fd00213g), 2016-11-16
Supplement: c6fd00213g1.pdf [file c6fd00213g1.pdf]

## Supporting Information:

Table S1. X-ray diffraction intensity measurements and data statistics of  $\Delta$ PsbM-PSII.

|                                                 |                      |
|-------------------------------------------------|----------------------|
| Dataset                                         | $\Delta$ PsbM_0.4MGy |
| Beamline                                        | BL38B1, SPring-8     |
| Wavelength (Å)                                  | 0.8                  |
| Averaged dose (MGy)                             | 0.4                  |
| Space group                                     | $P2_12_12_1$         |
| Unit cell a, b, c (Å)                           | 122.0, 227.0, 285.9  |
| Resolution (Å)                                  | 48.8-2.2 (2.32-2.20) |
| Measured reflections                            | 2,003,997 (272,075)  |
| Unique reflections                              | 385,629 (55,884)     |
| $R_{merge}$ (%) <sup>(i)</sup>                  | 8.3(70.5)            |
| $\langle I \rangle / \langle \sigma(I) \rangle$ | 13.6(2.2)            |
| Completeness (%)                                | 96.7(96.6)           |
| Redundancy                                      | 5.2(4.9)             |
| $R_{pim}$ (%) <sup>(ii)</sup>                   | 3.9(34.4)            |
| $CC(1/2)$ <sup>(iii)</sup>                      | 99.8(82.2)           |

The dataset name is combined with the averaged X-ray dose. Numbers in parentheses are for the highest resolution shell.

(i) Linear merging R-value.

$$R_{merge} = \frac{\sum_{hkl} \sum_{i=1}^N |I_i(hkl) - \overline{I(hkl)}|}{\sum_{hkl} \sum_{i=1}^N I_i(hkl)}$$

$I_i(hkl)$  is an integrated intensity of one reflection. The suffix  $i$  is for equivalent reflections and  $N$  is their number.  $\overline{I(hkl)}$  is an average for one unique reflection and the suffix  $hkl$  means unique reflections.

(ii) Precision-indicating merging R-value.

$$R_{pim} = \frac{\sum_{hkl} \left( \frac{I}{N-1} \right)^{1/2} \sum_{i=1}^N |I_i(hkl) - \overline{I(hkl)}|}{\sum_{hkl} \sum_{j=1}^N I_i(hkl)}$$

(iii) A correlation coefficient of integrated intensities between two half datasets randomly divided.

Table S2. Restrained least-squares refinement statistics of  $\Delta$ PsbM-PSII.

|                                     |                      |
|-------------------------------------|----------------------|
| Dataset                             | $\Delta$ PsbM_0.4MGy |
| Resolution (Å)                      | 48.8 – 2.2           |
| $R / R_{\text{free}}$               | 0.17 / 0.23          |
| DPI (Å)                             | 0.19                 |
| No. of chains                       | 38                   |
| No. of residues                     | 5147                 |
| No. of water molecules              | 2317                 |
| No. of ligand molecules             | 351                  |
| Averaged B-factor (Å <sup>2</sup> ) | 42.0                 |
| R.M.S. deviations                   |                      |
| Bond lengths (Å)                    | 0.016                |
| Bond angles (deg)                   | 2.34                 |
| Ramachandran plot (%)               |                      |
| Favoured region                     | 97.4                 |
| Allowed region                      | 2.40                 |
| Outlier region                      | 0.20                 |

The dataset name is combined with the averaged X-ray dose.

Table S3. Transmembrane helices in the  $\Delta$ PsbM-PSII structure and distances between two centers of transmembrane helix and dimer.

| Subunit       |     | Amino acid residue number in helix |      | Distance between helix and dimer centers (Å) |           | Averaged distance from dimer center (Å) | Difference of the distance (Å) | Averaged B-factor (Å <sup>2</sup> ) |
|---------------|-----|------------------------------------|------|----------------------------------------------|-----------|-----------------------------------------|--------------------------------|-------------------------------------|
|               |     | start                              | last | A-monomer                                    | B-monomer |                                         |                                |                                     |
| PsbL          |     | 17                                 | 35   | 14.180                                       | 14.203    | 14.191                                  | 0.023                          | 27.3                                |
| PsbT          |     | 4                                  | 22   | 17.245                                       | 17.242    | 17.243                                  | -0.003                         | 30.0                                |
| PsbB/C<br>P47 | I   | 19                                 | 39   | 23.537                                       | 23.670    | 23.604                                  | 0.132                          | 30.6                                |
|               | II  | 95                                 | 113  | 27.950                                       | 28.102    | 28.026                                  | 0.152                          | 30.7                                |
|               | III | 138                                | 158  | 44.132                                       | 44.263    | 44.197                                  | 0.131                          | 34.8                                |
|               | IV  | 197                                | 217  | 48.592                                       | 48.731    | 48.661                                  | 0.139                          | 36.5                                |
|               | V   | 236                                | 254  | 34.235                                       | 34.279    | 34.257                                  | 0.044                          | 29.5                                |
|               | VI  | 453                                | 471  | 29.463                                       | 29.458    | 29.461                                  | -0.005                         | 28.4                                |
| PsbD/D<br>2   | A   | 31                                 | 54   | 53.490                                       | 53.394    | 53.442                                  | -0.095                         | 32.8                                |
|               | B   | 110                                | 129  | 46.245                                       | 46.141    | 46.193                                  | -0.104                         | 30.3                                |
|               | C   | 142                                | 160  | 35.626                                       | 35.586    | 35.606                                  | -0.040                         | 27.4                                |
|               | D   | 194                                | 213  | 29.725                                       | 29.732    | 29.729                                  | 0.007                          | 24.4                                |
|               | E   | 272                                | 288  | 28.024                                       | 28.014    | 28.019                                  | -0.011                         | 25.6                                |
| PsbA/D<br>1   | A   | 31                                 | 54   | 34.028                                       | 34.040    | 34.034                                  | 0.012                          | 27.4                                |
|               | B   | 111                                | 130  | 39.109                                       | 39.137    | 39.123                                  | 0.028                          | 27.7                                |
|               | C   | 143                                | 161  | 41.703                                       | 41.729    | 41.716                                  | 0.026                          | 26.9                                |
|               | D   | 195                                | 214  | 41.152                                       | 41.163    | 41.158                                  | 0.011                          | 27.7                                |
|               | E   | 276                                | 292  | 44.882                                       | 44.890    | 44.886                                  | 0.009                          | 27.8                                |
| PsbC/C<br>P43 | I   | 51                                 | 69   | 73.629                                       | 73.776    | 73.703                                  | 0.148                          | 36.2                                |
|               | II  | 112                                | 130  | 80.560                                       | 80.682    | 80.621                                  | 0.122                          | 39.5                                |
|               | III | 160                                | 178  | 76.337                                       | 76.371    | 76.354                                  | 0.035                          | 42.5                                |
|               | IV  | 234                                | 252  | 74.604                                       | 74.655    | 74.630                                  | 0.051                          | 45.3                                |
|               | V   | 271                                | 289  | 58.035                                       | 58.141    | 58.088                                  | 0.106                          | 33.3                                |
|               | VI  | 425                                | 445  | 54.094                                       | 54.169    | 54.131                                  | 0.076                          | 31.1                                |

Atomic coordinates (x, y, z) of the dimer center was (15.933, 19.660, 15.901) in Å unit.

Table S3. Transmembrane helices in the  $\Delta$ PsbM-PSII structure and distances between two centers of transmembrane helix and dimer (continued).

| Subunit | Amino acid residue number in helix |      | Distance between helix and dimer centers (Å) |           | Averaged distance from dimer center (Å) | Difference of the distances (Å) | Averaged B-factor (Å <sup>2</sup> ) |      |
|---------|------------------------------------|------|----------------------------------------------|-----------|-----------------------------------------|---------------------------------|-------------------------------------|------|
|         | start                              | last | A-monomer                                    | B-monomer |                                         |                                 |                                     |      |
| PsbE    | 19                                 | 38   | 74.093                                       | 73.927    | 74.010                                  | -0.166                          | 48.8                                |      |
| PsbF    | 20                                 | 40   | 65.006                                       | 64.939    | 64.973                                  | -0.066                          | 39.0                                |      |
| PsbJ    | 11                                 | 30   | 67.928                                       | 67.928    | 67.928                                  | 0.000                           | 44.6                                |      |
| PsbK    | 20                                 | 39   | 71.794                                       | 71.914    | 71.854                                  | 0.120                           | 40.9                                |      |
| Psb30   | 20                                 | 37   | 78.354                                       | 78.446    | 78.400                                  | 0.092                           | 53.1                                |      |
| PsbZ    | 1                                  | 3    | 25                                           | 89.240    | 89.456                                  | 89.348                          | 0.216                               | 53.8 |
|         | 2                                  | 39   | 57                                           | 93.345    | 93.483                                  | 93.414                          | 0.138                               | 52.7 |
| PsbI    | 3                                  | 22   | 48.608                                       | 48.629    | 48.618                                  | 0.021                           | 39.2                                |      |
| PsbX    | 7                                  | 29   | 61.089                                       | 61.006    | 61.047                                  | -0.083                          | 47.5                                |      |
| PsbH    | 28                                 | 46   | 51.863                                       | 51.889    | 51.876                                  | 0.025                           | 39.7                                |      |

Atomic coordinates (x, y, z) of the dimer center was (15.933, 19.660, 15.901) in Å unit.

Table S4. Transmembrane helices in the 3WU2 structure superposed to  $\Delta$ PsbM-PSII and distances between two centers of transmembrane helix and dimer.

| Subunit       |     | Amino acid residue number in helix |      | Distance between helix and dimer centers (Å) |           | Averaged distance from dimer center (Å) | Difference of the distance (Å) | Averaged B-factor (Å <sup>2</sup> ) |
|---------------|-----|------------------------------------|------|----------------------------------------------|-----------|-----------------------------------------|--------------------------------|-------------------------------------|
|               |     | start                              | last | A-monomer                                    | B-monomer |                                         |                                |                                     |
| PsbL          |     | 17                                 | 35   | 14.636                                       | 14.648    | 14.642                                  | 0.012                          | 31.6                                |
| PsbT          |     | 4                                  | 22   | 17.361                                       | 17.379    | 17.370                                  | 0.018                          | 31.2                                |
| PsbB/C<br>P47 | I   | 19                                 | 39   | 23.332                                       | 23.380    | 23.356                                  | 0.048                          | 30.3                                |
|               | II  | 95                                 | 113  | 27.653                                       | 27.634    | 27.644                                  | -0.019                         | 31.6                                |
|               | III | 138                                | 158  | 44.120                                       | 44.182    | 44.151                                  | 0.062                          | 37.6                                |
|               | IV  | 197                                | 217  | 48.602                                       | 48.644    | 48.623                                  | 0.042                          | 39.5                                |
|               | V   | 236                                | 254  | 34.406                                       | 34.414    | 34.410                                  | 0.008                          | 30.1                                |
|               | VI  | 453                                | 471  | 29.648                                       | 29.659    | 29.654                                  | 0.011                          | 31.1                                |
| PsbD/D<br>2   | A   | 31                                 | 54   | 53.757                                       | 53.699    | 53.728                                  | -0.058                         | 34.8                                |
|               | B   | 110                                | 129  | 46.506                                       | 46.468    | 46.487                                  | -0.038                         | 32.1                                |
|               | C   | 142                                | 160  | 35.922                                       | 35.886    | 35.904                                  | -0.036                         | 29.3                                |
|               | D   | 194                                | 213  | 30.004                                       | 30.016    | 30.010                                  | 0.012                          | 26.8                                |
|               | E   | 272                                | 288  | 28.327                                       | 28.328    | 28.328                                  | 0.001                          | 27.6                                |
| PsbA/D<br>1   | A   | 31                                 | 54   | 34.074                                       | 34.106    | 34.090                                  | 0.032                          | 29.2                                |
|               | B   | 111                                | 130  | 39.202                                       | 39.239    | 39.221                                  | 0.037                          | 29.5                                |
|               | C   | 143                                | 161  | 41.866                                       | 41.903    | 41.885                                  | 0.037                          | 28.5                                |
|               | D   | 195                                | 214  | 41.449                                       | 41.458    | 41.454                                  | 0.009                          | 29.0                                |
|               | E   | 276                                | 292  | 45.092                                       | 45.119    | 45.106                                  | 0.027                          | 30.3                                |
| PsbC/C<br>P43 | I   | 51                                 | 69   | 73.803                                       | 73.908    | 73.856                                  | 0.105                          | 40.41                               |
|               | II  | 112                                | 130  | 80.690                                       | 80.807    | 80.749                                  | 0.117                          | 47.23                               |
|               | III | 160                                | 178  | 76.407                                       | 76.486    | 76.447                                  | 0.079                          | 46.04                               |
|               | IV  | 234                                | 252  | 74.612                                       | 74.683    | 74.648                                  | 0.071                          | 48.59                               |
|               | V   | 271                                | 289  | 58.193                                       | 58.260    | 58.227                                  | 0.067                          | 36.86                               |
|               | VI  | 425                                | 445  | 54.248                                       | 54.309    | 54.279                                  | 0.061                          | 32.64                               |

Atomic coordinates (x, y, z) of the dimer center was (15.933, 19.660, 15.901) in Å unit.

Table S4. Transmembrane helices in the 3WU2 structure superposed to  $\Delta$ PsbM-PSII and distances between two centers of transmembrane helix and dimer (continued).

| Subunit | Amino acid residue number in helix |      | Distance between helix and dimer centers (Å) |           | Averaged distance from dimer center (Å) | Difference of the distances (Å) | Averaged B-factor (Å <sup>2</sup> ) |
|---------|------------------------------------|------|----------------------------------------------|-----------|-----------------------------------------|---------------------------------|-------------------------------------|
|         | start                              | last | A-monomer                                    | B-monomer |                                         |                                 |                                     |
| PsbE    | 19                                 | 38   | 74.250                                       | 74.070    | 74.160                                  | -0.180                          | 50.8                                |
| PsbF    | 20                                 | 40   | 65.175                                       | 65.067    | 65.121                                  | -0.108                          | 42.7                                |
| PsbJ    | 11                                 | 30   | 68.070                                       | 68.074    | 68.072                                  | 0.004                           | 45.0                                |
| PsbK    | 20                                 | 39   | 71.981                                       | 72.091    | 72.036                                  | 0.110                           | 46.0                                |
| Psb30   | 20                                 | 37   | 78.530                                       | 78.610    | 78.570                                  | 0.080                           | 59.1                                |
| PsbZ    | 1                                  | 3    | 89.700                                       | 89.582    | 89.641                                  | -0.118                          | 67.6                                |
|         | 2                                  | 39   | 93.485                                       | 93.640    | 93.563                                  | 0.155                           | 63.8                                |
| PsbI    | 3                                  | 22   | 48.613                                       | 48.619    | 48.616                                  | 0.006                           | 40.1                                |
| PsbX    | 7                                  | 29   | 61.276                                       | 61.244    | 61.260                                  | -0.032                          | 51.0                                |
| PsbH    | 28                                 | 46   | 51.994                                       | 52.033    | 52.014                                  | 0.039                           | 42.2                                |

Atomic coordinates (x, y, z) of the dimer center was (15.933, 19.660, 15.901) in Å unit.

Table S5. Shift of  $\Delta$ PsbM-PSII transmembrane helices from 3WU2.

| Subunit       |     | Amino acid residue number in helix |      | Shift of helix center from 3WU2 to $\Delta$ PsbM-PSII (Å) |           | Averaged shift (Å) | Averaged radial shift* (Å) | Averaged lateral shift** (Å) |
|---------------|-----|------------------------------------|------|-----------------------------------------------------------|-----------|--------------------|----------------------------|------------------------------|
|               |     | start                              | last | A-monomer                                                 | B-monomer |                    |                            |                              |
| PsbL          |     | 17                                 | 35   | 0.488                                                     | 0.458     | 0.473              | -0.451                     | -0.144                       |
| PsbT          |     | 4                                  | 22   | 0.355                                                     | 0.316     | 0.335              | -0.127                     | -0.310                       |
| PsbB/C<br>P47 | I   | 19                                 | 39   | 0.444                                                     | 0.525     | 0.484              | 0.248                      | 0.416                        |
|               | II  | 95                                 | 113  | 0.415                                                     | 0.588     | 0.502              | 0.382                      | 0.324                        |
|               | III | 138                                | 158  | 0.113                                                     | 0.215     | 0.164              | 0.046                      | 0.157                        |
|               | IV  | 197                                | 217  | 0.119                                                     | 0.178     | 0.149              | 0.038                      | 0.144                        |
|               | V   | 236                                | 254  | 0.231                                                     | 0.233     | 0.232              | -0.153                     | 0.174                        |
|               | VI  | 453                                | 471  | 0.253                                                     | 0.308     | 0.281              | -0.193                     | 0.204                        |
| PsbD/D<br>2   | A   | 31                                 | 54   | 0.307                                                     | 0.366     | 0.336              | -0.286                     | -0.176                       |
|               | B   | 110                                | 129  | 0.280                                                     | 0.355     | 0.317              | -0.294                     | -0.120                       |
|               | C   | 142                                | 160  | 0.298                                                     | 0.301     | 0.299              | -0.298                     | -0.097                       |
|               | D   | 194                                | 213  | 0.290                                                     | 0.305     | 0.297              | -0.281                     | -0.097                       |
|               | E   | 272                                | 288  | 0.307                                                     | 0.315     | 0.311              | -0.309                     | -0.038                       |
| PsbA/D<br>1   | A   | 31                                 | 54   | 0.202                                                     | 0.166     | 0.184              | -0.056                     | -0.175                       |
|               | B   | 111                                | 130  | 0.220                                                     | 0.185     | 0.202              | -0.097                     | -0.177                       |
|               | C   | 143                                | 161  | 0.221                                                     | 0.242     | 0.231              | -0.169                     | -0.158                       |
|               | D   | 195                                | 214  | 0.311                                                     | 0.330     | 0.321              | -0.296                     | -0.123                       |
|               | E   | 276                                | 292  | 0.244                                                     | 0.267     | 0.276              | -0.219                     | -0.167                       |
| PsbC/C<br>P43 | I   | 51                                 | 69   | 0.211                                                     | 0.189     | 0.200              | -0.153                     | -0.129                       |
|               | II  | 112                                | 130  | 0.207                                                     | 0.184     | 0.196              | -0.128                     | -0.148                       |
|               | III | 160                                | 178  | 0.093                                                     | 0.143     | 0.118              | -0.093                     | -0.073                       |
|               | IV  | 234                                | 252  | 0.079                                                     | 0.072     | 0.076              | -0.018                     | -0.074                       |
|               | V   | 271                                | 289  | 0.182                                                     | 0.198     | 0.190              | -0.138                     | -0.131                       |
|               | VI  | 425                                | 445  | 0.222                                                     | 0.210     | 0.216              | -0.147                     | -0.158                       |

\* Negative values correspond to that the helix moves near the dimer center.

\*\* The rotation axis passing through the dimer center from stromal to luminal sides is defined, and the positive values indicate the right-handed rotation.



Table S5. Shift of  $\Delta$ PsbM-PSII transmembrane helices from 3WU2 (continued).

| Subunit | Amino acid residue number in helix |      | Shift of helix center from 3WU2 to $\Delta$ PsbM-PSII ( $\text{\AA}$ ) ( $\text{\AA}$ ) |           | Averaged shift ( $\text{\AA}$ ) | Averaged radial shift* ( $\text{\AA}$ ) | Averaged lateral shift** ( $\text{\AA}$ ) |
|---------|------------------------------------|------|-----------------------------------------------------------------------------------------|-----------|---------------------------------|-----------------------------------------|-------------------------------------------|
|         | start                              | last | A-monomer                                                                               | B-monomer |                                 |                                         |                                           |
| PsbE    | 19                                 | 38   | 0.296                                                                                   | 0.247     | 0.271                           | -0.150                                  | 0.226                                     |
| PsbF    | 20                                 | 40   | 0.296                                                                                   | 0.212     | 0.254                           | -0.148                                  | 0.206                                     |
| PsbJ    | 11                                 | 30   | 0.277                                                                                   | 0.226     | 0.252                           | -0.144                                  | 0.207                                     |
| PsbK    | 20                                 | 39   | 0.271                                                                                   | 0.209     | 0.240                           | -0.182                                  | 0.156                                     |
| Psb30   | 20                                 | 37   | 0.304                                                                                   | 0.253     | 0.278                           | -0.170                                  | 0.220                                     |
| PsbZ    | 1                                  | 3    | 0.558                                                                                   | 0.177     | 0.367                           | -0.293                                  | 0.222                                     |
|         | 2                                  | 39   | 0.343                                                                                   | 0.213     | 0.278                           | -0.149                                  | 0.235                                     |
| PsbI    | 3                                  | 22   | 0.224                                                                                   | 0.178     | 0.201                           | 0.002                                   | -0.201                                    |
| PsbX    | 7                                  | 29   | 0.291                                                                                   | 0.298     | 0.294                           | -0.213                                  | 0.203                                     |
| PsbH    | 28                                 | 46   | 0.196                                                                                   | 0.197     | 0.197                           | -0.138                                  | 0.140                                     |

\* Negative values correspond to that the helix moves near the dimer center.

\*\* The rotation axis passing through the dimer center from stromal to luminal sides is defined, and the positive values indicate the right-handed rotation.

Table S6. Atomic distances (Å) between two metal ions in the oxygen-evolving complex.

|                      | $\Delta$ PsbM_0.4MGy | 3WU2_0.43MGy <sup>(a)</sup> | 4UB6_XFEL <sup>(b)</sup> | 4UB8_XFEL <sup>(b)</sup> |
|----------------------|----------------------|-----------------------------|--------------------------|--------------------------|
| Mn1-Mn2              | 2.77, 2.75           | 2.87, 2.76                  | 2.61, 2.67               | 2.74, 2.68               |
| Mn1-Mn3              | 3.41, 3.29           | 3.28, 3.29                  | 3.18, 3.24               | 3.27, 3.10               |
| Mn1-Mn4              | 4.98, 4.87           | 4.99, 4.92                  | 4.97, 4.95               | 4.97, 4.89               |
| Mn2-Mn3              | 2.87, 2.77           | 2.88, 2.92                  | 2.67, 2.70               | 2.73, 2.71               |
| Mn2-Mn4              | 5.31, 5.24           | 5.44, 5.38                  | 5.18, 5.17               | 5.21, 5.27               |
| Mn3-Mn4              | 2.84, 2.81           | 2.97, 2.89                  | 2.83, 2.86               | 2.88, 2.91               |
| Ca-Mn1               | 3.68, 3.51           | 3.55, 3.49                  | 3.45, 3.51               | 3.49, 3.43               |
| Ca-Mn2               | 3.40, 3.37           | 3.39, 3.30                  | 3.29, 3.35               | 3.33, 3.32               |
| Ca-Mn3               | 3.49, 3.42           | 3.42, 3.41                  | 3.39, 3.47               | 3.41, 3.33               |
| Ca-Mn4               | 3.83, 3.82           | 3.79, 3.80                  | 3.86, 3.76               | 3.71, 3.76               |
| Averaged difference* | —                    | 0.016                       | -0.066                   | -0.065                   |

The dataset name is combined with the averaged X-ray dose except the XFEL structures. Two values in each frame are corresponding to A- and B-monomers. \*The averaged difference of atomic distances, calculated using the  $\Delta$ PsbM-PSII structure as the standard. <sup>(a)</sup>Umena et al. 2011, and <sup>(b)</sup>Suga et al., 2015.
